# Supplementary material
Source: PubMed Central journal article supplement (PMC5452813)
Supplement: AEM.00277-17_zam999117889s1.pdf [file AEM.00277-17_zam999117889s1.pdf]

1 **Denyes et al. - Supplemental Material**

2

3 **Table S1:** Optimization of LTF-MB enrichment protocol. A generalized setup of  $7.00 \times$   
 4  $10^4$  beads/ $\mu\text{L}$ ,  $10^4$  *S. Typhimurium* DB7155 cells, PBS buffer pH 7.0, 250 mM NaCl, was  
 5 used to analyze three variables: density beads per assay, pH, and NaCl concentration.  
 6 Recovery rates are reported as a percentage of bead-enriched *Salmonella* cells / total  
 7 *Salmonella* cells. Experiments were performed in triplicate and presented as mean  $\pm$   
 8 Standard Deviation (SD).

9

| Tested variable                         |                    | Rate of Recovery %<br>(mean $\pm$ SD) |
|-----------------------------------------|--------------------|---------------------------------------|
| Bead density<br>(beads/ $\mu\text{L}$ ) | $1.75 \times 10^4$ | $90 \pm 2$                            |
|                                         | $7.0 \times 10^4$  | $98 \pm 2$                            |
|                                         | $1.75 \times 10^5$ | $98 \pm 1$                            |
|                                         | $2.45 \times 10^5$ | $98 \pm 1$                            |
|                                         | $3.5 \times 10^5$  | $98 \pm 2$                            |
| Buffer and pH                           | Citrate pH 3       | $2 \pm 0.1$                           |
|                                         | Citrate pH 4       | $21 \pm 2$                            |
|                                         | Citrate pH 5       | $98 \pm 0.5$                          |
|                                         | Citrate pH 6       | $97 \pm 2$                            |
|                                         | PBS pH 7           | $98 \pm 1$                            |
|                                         | PBS pH 8           | $98 \pm 1.5$                          |
|                                         | PBS pH 9           | $96 \pm 2$                            |
| Buffer NaCl<br>concentration            | 0 mM               | $98 \pm 1$                            |
|                                         | 125 mM             | $98 \pm 1$                            |
|                                         | 250 mM             | $98 \pm 1.1$                          |
|                                         | 500 mM             | $93 \pm 1$                            |
|                                         | 750 mM             | $95 \pm 1$                            |
|                                         | 1 M                | $90 \pm 5$                            |

10

11

12 **Table S2:** Calculating A.U.<sub>.450nm</sub> / initial *Salmonella* cell numbers (log<sub>10</sub>CFU) to quantify the  
 13 discrepancy in labeling efficiency of ELLTA. The mean A.U.<sub>.450nm</sub> data from duplicate  
 14 measurements was blank subtracted and divided by the mean number of cells per assay  
 15 (log<sub>10</sub>CFU). The A.U.log<sub>10</sub>CFU<sup>-1</sup> per strain is tabulated in order of binding strength.  
 16 A.U.log<sub>10</sub>CFU<sup>-1</sup> values of 0.01 or negative indicate no labeling by HRP-LTF.

| <i>Salmonella</i> strains                            | Designation | A.U. <sub>.450nm</sub><br>(raw) | Absorbance <sub>raw</sub><br>-0.24 <sub>blank</sub> | log <sub>10</sub> CFU per<br>assay | Ab <sub>correct</sub> / log <sub>10</sub> CFU<br>(A.U.log <sub>10</sub> CFU <sup>-1</sup> ) |
|------------------------------------------------------|-------------|---------------------------------|-----------------------------------------------------|------------------------------------|---------------------------------------------------------------------------------------------|
| <i>S. Typhimurium</i>                                | DB7155      | 3.02                            | 2.79                                                | 5.86                               | 0.48                                                                                        |
| <i>S. Javiana</i>                                    | N2427-08    | 2.92                            | 2.69                                                | 5.84                               | 0.46                                                                                        |
| <i>S. Indiana</i>                                    |             | 2.81                            | 2.58                                                | 5.90                               | 0.44                                                                                        |
| <i>S. Typhimurium</i>                                | N11-2063    | 2.82                            | 2.59                                                | 6.11                               | 0.42                                                                                        |
| <i>S. Typhimurium</i> LT2                            | ATCC 14028  | 2.43                            | 2.19                                                | 5.68                               | 0.39                                                                                        |
| <i>Salmonella bongori</i>                            | N268-08     | 2.59                            | 2.36                                                | 6.10                               | 0.39                                                                                        |
| <i>S. Newport</i>                                    | N2932-08    | 2.43                            | 2.20                                                | 5.82                               | 0.38                                                                                        |
| <i>S. Typhimurium</i>                                | N11-2679    | 2.46                            | 2.23                                                | 6.05                               | 0.37                                                                                        |
| <i>Salmonella enterica</i> ssp.<br><i>diarizonae</i> | N09-2338    | 2.50                            | 2.27                                                | 6.27                               | 0.36                                                                                        |
| <i>S. Heidelberg</i>                                 | N2743-08    | 2.22                            | 1.99                                                | 6.25                               | 0.32                                                                                        |
| <i>Salmonella enterica</i> ssp. <i>salamae</i>       | N09-2794    | 2.13                            | 1.90                                                | 6.36                               | 0.30                                                                                        |
| <i>S. Typhimurium</i>                                | N11-2388    | 1.94                            | 1.70                                                | 6.09                               | 0.28                                                                                        |
| <i>S. Typhimurium</i>                                | N07-1209    | 1.86                            | 1.63                                                | 6.22                               | 0.26                                                                                        |
| <i>S. Typhimurium</i>                                | N11-2663    | 1.74                            | 1.50                                                | 6.22                               | 0.24                                                                                        |
| <i>S. Newport</i>                                    | WS2681      | 1.69                            | 1.46                                                | 6.22                               | 0.23                                                                                        |
| <i>S. Enteritidis</i> C                              |             | 1.55                            | 1.31                                                | 5.99                               | 0.22                                                                                        |
| <i>Salmonella enterica</i> ssp.<br><i>houtenae</i>   | N09-2589    | 1.25                            | 1.02                                                | 6.39                               | 0.16                                                                                        |
| <i>S. Infantis</i>                                   |             | 1.14                            | 0.91                                                | 6.25                               | 0.15                                                                                        |
| <i>S. Hadar</i>                                      | WS 2691     | 0.97                            | 0.74                                                | 5.62                               | 0.13                                                                                        |
| <i>Salmonella enterica</i> ssp. <i>arizonae</i>      | N09-0860    | 0.79                            | 0.55                                                | 6.36                               | 0.09                                                                                        |
| <i>S. Montevideo</i>                                 | WS2678      | 0.62                            | 0.39                                                | 6.27                               | 0.06                                                                                        |
| <b>Non-<i>Salmonella</i> strains</b>                 |             |                                 |                                                     |                                    |                                                                                             |
| <i>Bacillus cereus</i>                               | HER 1399    | 0.29                            | 0.05                                                | 5.37                               | 0.01                                                                                        |
| <i>Cronobacter sakazakii</i>                         | ATCC 29544  | 0.27                            | 0.03                                                | 6.43                               | 0.01                                                                                        |
| <i>Citrobacter freundii</i>                          | N 0106      | 0.24                            | 0.00                                                | 6.25                               | 0.00                                                                                        |
| <i>Bacillus atrophaeus</i> ( <i>subtilis</i> )       | ATCC 9372   | 0.16                            | -0.07                                               | 5.24                               | -0.01                                                                                       |
| <i>Enterobacter aerogenes</i>                        | DSM 30053   | 0.17                            | -0.07                                               | 6.30                               | -0.01                                                                                       |
| <i>Escherichia coli</i>                              | CGSC4401    | 0.17                            | -0.06                                               | 5.62                               | -0.01                                                                                       |
| <i>Escherichia vulneris</i>                          | DSM 4564    | 0.15                            | -0.09                                               | 6.21                               | -0.01                                                                                       |
| <i>Listeria monocytogenes</i>                        | WSLC 1001   | 0.15                            | -0.08                                               | 6.20                               | -0.01                                                                                       |
| <i>Klebsiella</i>                                    | 1319        | 0.13                            | -0.10                                               | 6.54                               | -0.02                                                                                       |
| <i>Staphylococcus aureus</i>                         | ATCC 19685  | 0.08                            | -0.16                                               | N/A                                | N/A                                                                                         |

18 **Figure S1:** Enzyme-linked LTF Assay (ELLTA) workflow. **1)** LTF-MBs are incubated for  
 19 45 minutes with aliquots of **(A)** pre-enriched food samples or **(B)** bacterial dilutions. **2)**  
 20 LTF-MBs are magnetically separated and washed with PBS-T. **3)** Either LTF-MBs are  
 21 resuspended in PBS-T and plated on selective agar for colony counting to determine initial  
 22 contamination numbers, or **4)** for ELLTA, after washing the LTF-MBs are incubated for 30  
 23 minutes with the HRP-LTF probe. **5)** After magnetic separation and washing, TMB solution  
 24 is incubated with the beads for 15 minutes and is converted by the bacteria-bound HRP-  
 25 LTF probe to the blue chromogen. **6)** The LTF-MBs are magnetically separated and the  
 26 catalyzed TMB solution dispensed into 96 well plates for spectrophotometric absorbance  
 27 measurements after acidification with H<sub>2</sub>SO<sub>4</sub> to produce a yellow chromogen for increased  
 28 measurement sensitivity.

29

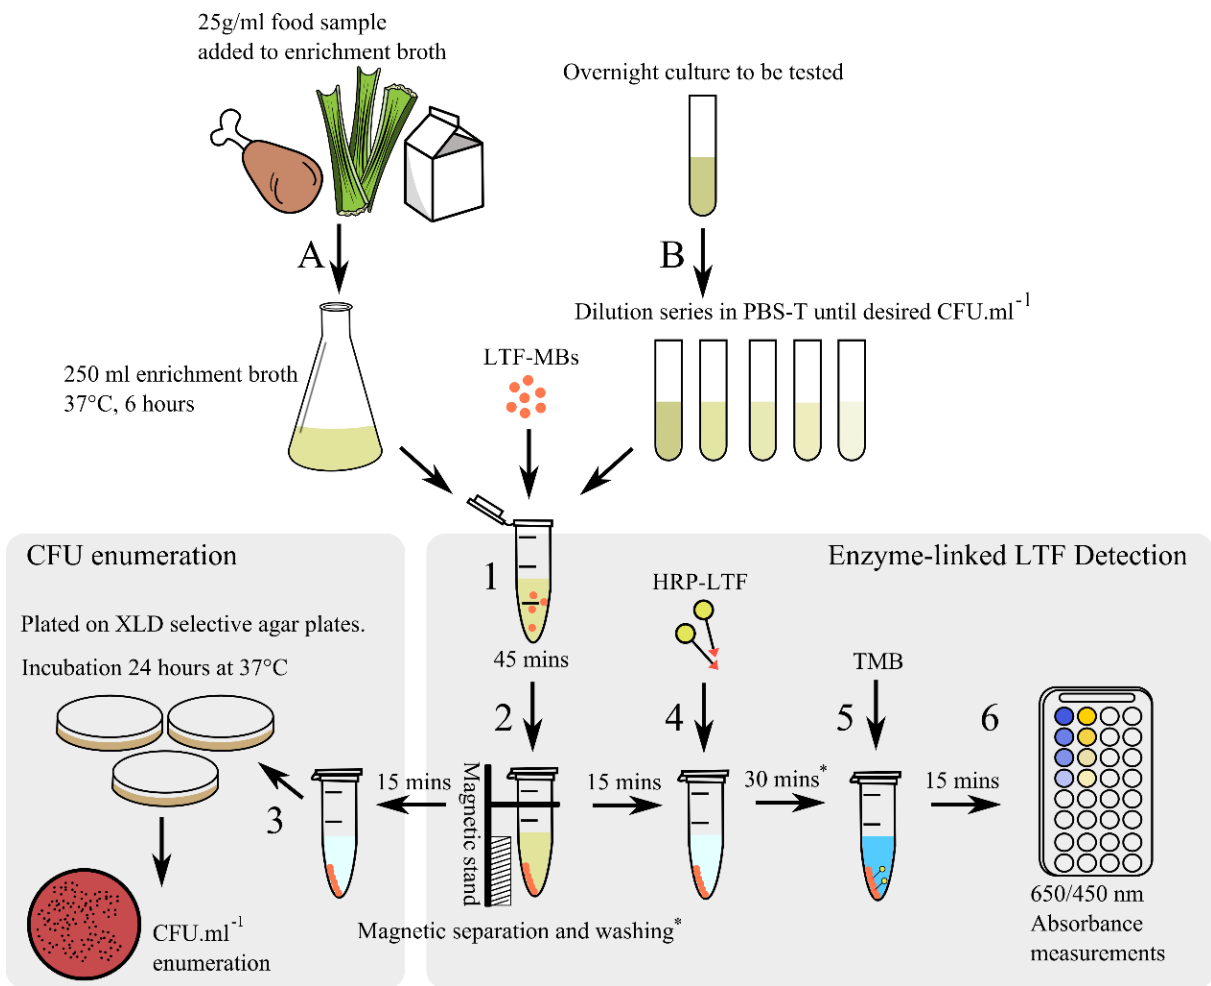

30
